# Supplementary material for: Aircraft-engine particulate matter emissions from conventional and sustainable aviation fuel combustion: comparison of measurement techniques for mass, number, and size
Source: Copernicus journal article supplement (doi:10.5194/amt-2021-320), 2022-01-03
Supplement: Supplementary file [file amt-2021-320-AC1-supplement.pdf]

1 Author responses to reviews of  
2 amt-2021-320:

3 "Aircraft-engine particulate matter emissions from conventional  
4 and sustainable aviation fuel combustion: comparison of  
5 measurement techniques for mass, number, and size"  
6 by J. C. Corbin et al.

7 1. RC2

8 I struggle with the assessment of this work: while the all the methods and results  
9 presented are of respectable scientific quality, I think there is a lack of focus in terms of  
10 relevance and scope for AMT. There is no novelty in concepts or data treatment and it is  
11 not clear what the real scientific value of the study is. For regulatory purposes there is  
12 little value due to the non-compliant sampling system, non- existent pre experiment  
13 calibration etc. The scientific value is also limited – I understand the argument for  
14 connecting ground measurements to cruise at altitude data, but for that purpose, a more  
15 focused effort with a better experimental design that would allow tracking down  
16 sampling/ conditioning from instrument issues would be beneficial. With the current  
17 manuscript one gets the impression that it is a side product of a bigger effort and was not  
18 carefully thought through when the experiment was conducted – which is not necessarily  
19 a problem if the reader does not get this impression, but I currently do.

20  
21 Our third-last paragraph in the introduction provided some  
22 justification. This paragraph was followed by a misplaced paragraph  
23 describing the measurement campaign – that misplaced paragraph has now  
24 been moved to Methods, and a new sentence added to the third-last  
25 paragraph. The full paragraph is now (new text underlined):

26  
27 The standardized system components are not easily adaptable for use  
28 on aircraft for measurement of cruise level nvPM emissions. Consequently,  
29 there are no comparable in-flight engine-emissions data available for  
30 developing and validating models that predict cruise nvPM-emissions based  
31 on engine certification data. Particle size distribution measurements are also

32 not included in the standardized system, which are important for assessing  
33 the effects of fuels, operating conditions, and engine technologies on the  
34 environmental impacts of PM emissions. Thus to advance our understanding  
35 of aircraft engine emissions and the factors that control them as well as to  
36 develop a large and consistent observational data base, it is important to  
37 evaluate the relative performance of other diagnostic instruments that are  
38 not prescribed in the standardized protocol but meet these needs. Such  
39 instruments must be evaluated for their response to nvPM and total PM  
40 emissions from aircraft engines using standardized and non-standardized  
41 systems, and for measurements at the engine exit plane and downstream of  
42 the engine in the near field, since these instruments are typically used with  
43 minimal change to their operating parameters for a wide range of sampling  
44 conditions. Very limited data are available in the literature for this purpose,  
45 and no data have yet been published for SAFs.

46  
47 Thus, this manuscript features one aspect of the detailed analysis that  
48 is one facet of a large collaborative project. The manuscript, with its analysis  
49 of the response of instruments to variations in the properties of the  
50 particulate emissions with fuel type, has implications for in-flight  
51 measurements of SAF emission factors, standardized vs. non-standardized  
52 measurements, and total vs. non-volatile PM emissions.

53  
54 Major comments:

55 The comparison of the mass measurement is somewhat biased experimentally (due to  
56 distance to the engine, dilution, detection limits and long lines etc.) to higher thrust levels.  
57 At these thrust levels it is not a major surprise that there is not much variability in  
58 instrument responses (little OC, larger aggregate sizes, soot properties less influenced by  
59 fuel type etc.). I also tend to disagree with the authors conclusion that a 30-50% difference  
60 is a "comparable" especially for the near real time in situ instruments such as MSS LII and  
61 CAPS. Would be good to point this out to the reader, or even split the discussion for  
62 cruising relevant (i.e. 50 -70% thrust) and near idle thrusts this might improve the lack of

63 relevance pointed out above.

64 The bias to “higher” thrust levels is only caused by the rejection of  
65 some test points at 23% thrust. Some 23% data was retained, and the  
66 remainder of the data spans 40% to 83%. This range of thrusts is  
67 substantial.

68 We agree with the reviewer’s “disagreement” that 30-50% is not really  
69 “comparable”. We did not intend to imply that a 30-50% disagreement is not  
70 statistically significant. We believe that it is significant and implies a  
71 systematic bias (e.g. calibration drift or imperfect line-loss corrections)  
72 between the instruments. The reviewer may have the impression that we  
73 believed otherwise because our discussion focussed on the larger  
74 disagreements of the SMPS and filter-based instruments (up to a factor of 2).

75  
76 When we searched the manuscript for the word “comparable” we  
77 could not find that word used to imply no statistical significance. We do  
78 agree that we made that implication by omission. We modified Section 4.4.1:

79  
80 The agreement of the real-time measurements to within 30 % is  
81 ~~notable considering the different types of instruments used.~~ larger than the  
82 calibration uncertainties of the individual instruments, and suggests an  
83 influence of systematic biases (e.g. in instrument calibration or penetration  
84 corrections). There is no evidence of systematic differences between  
85 absorption and LII measurements, which might have been hypothesized if  
86 coatings of volatile PM on the light-absorbing nvPM had enhanced  
87 absorption.

88  
89 Here we also added the underlined sentence to introduce a new  
90 hypothesis about why the measurements might differ.

91  
92 We have not observed any systematic differences by thrust. Figure 11  
93 shows this for N1 thrusts from 40% to 83%. Any differences between

94 instruments are larger than differences between thrusts. So, we have not  
95 taken the reviewer's last suggestion.

96

97 It would be beneficial to show the comparison of measured concentration as a function of  
98 CO<sub>2</sub> (at least in the SI)

99 All requested information was provided in the supplementary data  
100 file. The measured CO<sub>2</sub> increment ranged from 0 ppm to 929 ppm, with  
101 median 384 ppm.

102 We take this comment to be related to the comparison of the mass  
103 instruments, for example in Figures 8 and 9. We agree that the relevant axis  
104 for a mass instrument comparison is mass concentration. However, the  
105 instruments shown in Figures 8 and 9 were located on different sampling  
106 lines and experienced different levels of dilution. Therefore, we were forced  
107 to compare these instruments in terms of EIm rather than mass  
108 concentration.

109 SMPS EIm derivation: this work makes the impression that an SMPS measures the volume  
110 size distribution with high precision and there is furthermore no need to apply a size  
111 dependent effective density (which I believe is crucial for larger sizes). It would be  
112 beneficial for the discussion to elaborate on this based on previous experiences on  
113 helicopter or jet engines [...]

114

115 The reviewer is correct that we omitted a description of the SMPS PSD  
116 mass integration in our Methods section. We now added the following  
117 paragraph:

118 Finally, the SMPS PSDs were converted to equivalent mass  
119 concentrations by the integrated PSD approach, described in detail by  
120 Momenimovahed and Olfert (2015). In brief, the equivalent mass of each  
121 SMPS-reported mobility diameter was calculated using an effective density of  
122 1000 kg m<sup>-3</sup>, which has been shown to produce better than 20% accuracy  
123 relative to more complete, size-resolved effective densities (Durdina et al.,  
124 2014).
